# Supplementary material for: Success of Current COVID-19 Vaccine Strategies vs. the Epitope Topology of SARS-CoV-2 Spike Protein-Receptor Binding Domain (RBD): A Computational Study of RBD Topology to Guide Future Vaccine Design
Source: MDPI journal article supplement (doi:10.3390/vaccines10060841), 2022-05-25
Supplement: s1 [file s1]

## SUPPLEMENTARY DATA

# Success of current COVID-19 vaccine strategies vs. the epitope topology of SARS-CoV-2 spike protein-receptor binding domain (RBD): A computational study of RBD topology to guide future vaccine design.

Santhinissi Addala<sup>1, #</sup>, Madhuri Vissapragada<sup>2, #</sup>, Madhumita Aggunna<sup>3</sup>, Niharikha Mukala<sup>4</sup>,  
Manisha Lanka<sup>5</sup>, Shyamkumar Gampa<sup>5</sup>, Manikanta Sodasani<sup>5</sup>, Jahnavi Chintalapati<sup>5</sup>,  
Akhila Kamidi<sup>5</sup>, Ravindra P. Veeranna<sup>6, \*</sup> and Ravikiran S. Yedidi<sup>1, 2, 3, 4, 5, 7 \*</sup>

### Affiliations:

<sup>1</sup>Stem Cell Biology branch, <sup>2</sup>Synthetic Biology branch, <sup>3</sup>Multiomics-Oncology & Immunotherapy branch, <sup>4</sup>Multiomics-Infectious Diseases branch, <sup>5</sup>Department of Intramural research core, The Center for Advanced-Applied Biological Sciences & Entrepreneurship (TCABS-E), Visakhapatnam 530016, A.P. India; <sup>6</sup>Department of Biochemistry, Central Food Technological Research Institute, Mysore 570020, K.A. India. <sup>6</sup>Department of Zoology, Andhra University, Visakhapatnam 530003, A.P. India. <sup>#</sup>Contributed equally.

\*Correspondence: R.S.Y.: [tcabse.india@gmail.com](mailto:tcabse.india@gmail.com) & R.P.V.: [raviravindra1@gmail.com](mailto:raviravindra1@gmail.com)

Postal address:

Ravikiran S. Yedidi, Ph.D.

Department of Intramural Research Core  
The Center for Advanced-Applied Biological Sciences & Entrepreneurship (TCABS-E)  
Door No. 47-11-19/19, Fourth floor  
Seethammapeta Main Road, Dwarakanagar  
Visakhapatnam. 530016  
Phone: +91-8660301662  
E-mail: [tcabse.india@gmail.com](mailto:tcabse.india@gmail.com)

# SUPPLEMENTARY DATA

**Table S1.** Systematic base-substitutions in RBD mRNA sequence and RNAfold parameters.

| Position | Wildtype triplet | Mutant | Minimum free energy (kcal/mol) | Ensemble diversity | *AMFE (kcal/mol) | *Viral fitness (%) |
|----------|------------------|--------|--------------------------------|--------------------|------------------|--------------------|
| 89       | AAG              | ACG    | -185.89                        | 108.32             | -1.71            | 101.18             |
|          |                  | AGG    | -184.44                        | 108.74             | -1.69            | 100.00             |
|          |                  | AUG    | -184.22                        | 108.4              | -1.69            | 100.00             |
|          |                  | CAG    | -183.3                         | 108.72             | -1.68            | 99.41              |
|          |                  | GAG    | -186.89                        | 108.31             | -1.72            | 101.77             |
|          |                  | AAC    | -180.14                        | 112.93             | -1.59            | 94.08              |
|          |                  | AAU    | -180.16                        | 109.24             | -1.64            | 97.04              |
| 118      | GGU              | GGU    | -183.78                        | 108.3              | -1.69            | 100.00             |
|          |                  | GAU    | -183.29                        | 108.32             | -1.69            | 100.00             |
|          |                  | GCU    | -186.22                        | 107.57             | -1.73            | 102.37             |
|          |                  | GUU    | -185.21                        | 110.05             | -1.68            | 99.41              |
|          |                  | AGU    | -181.38                        | 118.36             | -1.53            | 90.53              |
|          |                  | CGU    | -181.12                        | 113.11             | -1.6             | 94.67              |
|          |                  | UGU    | -181.35                        | 114.16             | -1.58            | 93.50              |
| 121      | UAU              | UCU    | -182.02                        | 134.75             | -1.35            | 79.88              |
|          |                  | UGU    | -183.81                        | 108.42             | -1.69            | 100.00             |
|          |                  | UUU    | -182.7                         | 107.92             | -1.69            | 100.00             |
|          |                  | AAU    | -181.19                        | 110.01             | -1.64            | 97.04              |
|          |                  | CAU    | -181.17                        | 109.54             | -1.65            | 97.63              |
|          |                  | GAU    | -182.2                         | 108.86             | -1.67            | 98.81              |
| 159      | AAU              | ACU    | -184.24                        | 98.09              | -1.87            | 110.65             |
|          |                  | AGU    | -189.25                        | 77.2               | <b>-2.45</b>     | 144.97             |
|          |                  | AUU    | -183.77                        | 107.63             | -1.7             | 100.59             |
|          |                  | CAU    | -184.21                        | 94.86              | -1.94            | 114.79             |
|          |                  | GAU    | -186.13                        | 104.52             | -1.78            | 105.32             |
|          |                  | UAU    | -183.55                        | 112.65             | -1.62            | 95.85              |
|          |                  | AAA    | -183.54                        | 110.71             | -1.65            | 97.63              |
|          |                  | AAG    | -185.49                        | 82.61              | -2.24            | 132.54             |
| 165      | CAA              | CCA    | -184.14                        | 102.59             | -1.79            | 105.91             |
|          |                  | CGA    | -183.56                        | 114                | -1.61            | 95.26              |

# SUPPLEMENTARY DATA

|     |     |     |         |        |             |        |
|-----|-----|-----|---------|--------|-------------|--------|
|     |     | CUA | -182.98 | 103.85 | -1.76       | 104.14 |
|     |     | AAA | -183.1  | 103.19 | -1.77       | 104.73 |
|     |     | GAA | -183.03 | 105.83 | -1.72       | 101.77 |
|     |     | CAU | -182.51 | 105.68 | -1.72       | 101.77 |
|     |     | CAC | -183.55 | 108.55 | -1.69       | 100.00 |
| 168 | GGU | GAU | -179.67 | 109.75 | -1.63       | 96.44  |
|     |     | GCU | -181.64 | 106.8  | -1.7        | 100.59 |
|     |     | GUU | -179.25 | 96.07  | -1.86       | 110.06 |
|     |     | AGU | -182.35 | 75.92  | <b>-2.4</b> | 142.01 |
|     |     | CGU | -179.56 | 112.23 | -1.59       | 94.08  |
|     |     | UGU | -179.62 | 113.86 | -1.57       | 92.89  |
| 170 | CAA | CCA | -179.82 | 116.41 | -1.54       | 91.12  |
|     |     | CGA | -183.48 | 108.33 | -1.69       | 100.00 |
|     |     | CUA | -179.82 | 122.53 | -1.46       | 86.39  |
|     |     | AAA | -179.07 | 131.06 | -1.36       | 80.47  |
|     |     | GAA | -179.47 | 126.85 | -1.41       | 83.43  |
|     |     | CAU | -179.88 | 123.01 | -1.46       | 86.39  |
|     |     | CAC | -179.82 | 120.07 | -1.49       | 88.16  |
| 172 | ACU | AAU | -183.93 | 108.17 | -1.7        | 100.59 |
|     |     | AGU | -184.7  | 107.92 | -1.71       | 101.18 |
|     |     | AUU | -183.78 | 108.35 | -1.69       | 100.00 |
|     |     | CCU | -182.74 | 110.2  | -1.65       | 97.63  |
|     |     | GCU | -183.39 | 108.39 | -1.69       | 100.00 |
|     |     | UCU | -183.66 | 107.83 | -1.7        | 100.59 |
| 173 | AAU | ACU | -183.86 | 108.42 | -1.69       | 100.00 |
|     |     | AGU | -183.78 | 108.3  | -1.69       | 100.00 |
|     |     | AUU | -183.85 | 108.24 | -1.69       | 100.00 |
|     |     | CAU | -183.78 | 108.27 | -1.69       | 100.00 |
|     |     | GAU | -183.78 | 108.34 | -1.69       | 100.37 |
|     |     | UAU | -183.78 | 108.3  | -1.69       | 100.00 |
|     |     | AAA | -183.06 | 108.56 | -1.68       | 99.40  |
|     |     | AAG | -183.12 | 111.25 | -1.64       | 97.04  |
| 174 | GGU | GAU | -179.14 | 122.13 | -1.46       | 86.39  |
|     |     | GCU | -179.18 | 121.55 | -1.47       | 86.98  |
|     |     | GUU | -180.29 | 114.95 | -1.56       | 92.30  |

# SUPPLEMENTARY DATA

|     |          |      |         |        |             |        |
|-----|----------|------|---------|--------|-------------|--------|
|     |          | AGU  | -180.83 | 97.38  | -1.88       | 111.24 |
|     |          | CGU  | -179.5  | 117.64 | -1.52       | 89.94  |
|     |          | UGU  | -180.61 | 113.73 | -1.58       | 93.49  |
| 177 | UAC      | UCC  | -181.97 | 96.55  | -1.88       | 111.24 |
|     |          | UGC  | -183.39 | 117.72 | -1.55       | 91.71  |
|     |          | UUC  | -183.62 | 76.28  | <b>-2.4</b> | 142.01 |
|     |          | AAC  | -184.04 | 108.6  | -1.69       | 100.00 |
|     |          | CAC  | -183.02 | 109.52 | -1.67       | 98.81  |
|     |          | GAC  | -184.75 | 108.45 | -1.7        | 100.59 |
| All | Wildtype | None | -183.78 | 108.3  | -1.69       | 100.00 |

\*AMFE (Average minimum free energy in kcal/mol.) = Free energy/Ensemble diversity.

#Viral fitness (%) = (Mutant AMFE x 100) / Wild type AMFE (-1.69 kcal/mol.)

## SUPPLEMENTARY DATA

**Table S2.** \*Viral fitness (%) for mutants based on the binding affinity calculations from the number of hydrogen bonds at the RBD-ACE2 receptor binding interface compared to the wild type (taken as 100%).

| Substitution | K89          | G118  | Y121  | N159  | Q165  | G168         | Q170  | T172         | N173  | G174         | Y177         |
|--------------|--------------|-------|-------|-------|-------|--------------|-------|--------------|-------|--------------|--------------|
| Ala          | 92.31        | 100.0 | 84.62 | 84.62 | 92.31 | 100.0        | 92.31 | 92.31        | 92.31 | 100.0        | 92.31        |
| Cys          | 92.31        | 100.0 | 84.62 | 84.62 | 92.31 | 100.0        | 92.31 | 92.31        | 92.31 | 100.0        | 92.31        |
| Asp          | 92.31        | 100.0 | 84.62 | 92.31 | 92.31 | <b>107.7</b> | 92.31 | <b>115.4</b> | 100.0 | <b>115.4</b> | 92.31        |
| Glu          | 92.31        | 100.0 | 84.62 | 84.62 | 92.31 | 100.0        | 100.0 | 100.0        | 100.0 | <b>107.7</b> | 92.31        |
| Phe          | 92.31        | 100.0 | 84.62 | 84.62 | 92.31 | 100.0        | 92.31 | 92.31        | 92.31 | 100.0        | 92.31        |
| Gly          | 92.31        | WT    | 84.62 | 84.62 | 92.31 | WT           | 92.31 | 92.31        | 92.31 | WT           | 92.31        |
| His          | 92.31        | 100.0 | 84.62 | 92.31 | 92.31 | 100.0        | 92.31 | 92.31        | 92.31 | <b>115.4</b> | 92.31        |
| Ile          | 92.31        | 100.0 | 84.62 | 84.62 | 92.31 | 100.0        | 92.31 | 92.31        | 92.31 | 100.0        | 92.31        |
| Lys          | WT           | 100.0 | 84.62 | 92.31 | 92.31 | <b>107.7</b> | 92.31 | 92.31        | 92.31 | 100.0        | 100.0        |
| Leu          | 92.31        | 100.0 | 84.62 | 84.62 | 92.31 | 100.0        | 92.31 | 92.31        | 92.31 | 100.0        | 92.31        |
| Met          | 92.31        | 100.0 | 84.62 | 84.62 | 92.31 | 100.0        | 92.31 | 92.31        | 92.31 | 100.0        | 92.31        |
| Asn          | 92.31        | 100.0 | 84.62 | WT    | 92.31 | <b>115.4</b> | 92.31 | 92.31        | WT    | <b>107.7</b> | 92.31        |
| Pro          | 92.31        | 100.0 | 84.62 | 84.62 | 92.31 | 100.0        | 92.31 | 92.31        | 92.31 | 100.0        | 92.31        |
| Gln          | 92.31        | 100.0 | 84.62 | 92.31 | WT    | <b>107.7</b> | WT    | 92.31        | 92.31 | <b>115.4</b> | 92.31        |
| Arg          | 92.31        | 100.0 | 84.62 | 92.31 | 92.31 | <b>115.4</b> | 92.31 | 92.31        | 92.31 | <b>115.4</b> | <b>115.4</b> |
| Ser          | 92.31        | 100.0 | 84.62 | 84.62 | 92.31 | <b>107.7</b> | 92.31 | 100.0        | 92.31 | <b>107.7</b> | 100.0        |
| Thr          | 92.31        | 100.0 | 84.62 | 84.62 | 92.31 | <b>107.7</b> | 92.31 | WT           | 92.31 | <b>107.7</b> | 100.0        |
| Val          | 92.31        | 100.0 | 84.62 | 92.31 | 92.31 | 100.0        | 92.31 | 92.31        | 92.31 | 100.0        | 92.31        |
| Trp          | 92.31        | 100.0 | 84.62 | 84.62 | 92.31 | 100.0        | 92.31 | 92.31        | 92.31 | 100.0        | 92.31        |
| Tyr          | <b>107.7</b> | 100.0 | WT    | 84.62 | 92.31 | <b>107.7</b> | 92.31 | 92.31        | 100.0 | <b>115.4</b> | WT           |

\*Viral fitness (%) of mutants = (No. of interface H-bonds of mutant x 100) / No. of interface H-bonds of wild type.

NOTE: Amino acid substitutions with enhanced viral fitness are shown in bold font.

# SUPPLEMENTARY DATA

**Table S3.** Structural deviations that are >2.0 Å and <3.0 Å seen in mutants based on the C<sub>α</sub> RMS deviations compared to the wild type at the site of mutation vs. off-sites. For deviations >3 please see Figure 6. For a complete histogram please see Figure 4.

| Mutation | Lys89     |            | Tyr121    |                                           | Gly174    |          |
|----------|-----------|------------|-----------|-------------------------------------------|-----------|----------|
|          | Mut. site | Off-site   | Mut. site | Off-site                                  | Mut. site | Off-site |
| Ala      | <2.0 Å    | <2.0 Å     | 0.9 Å     | 2.1Å (149),<br>2.2Å (192) &<br>2.3Å (193) | <2.0 Å    | <2.0 Å   |
| Cys      | <2.0 Å    | <2.0 Å     | 0.9 Å     | 2.1Å (149),<br>2.2Å (192) &<br>2.3Å (193) | <2.0 Å    | <2.0 Å   |
| Asp      | <2.0 Å    | <2.0 Å     | 0.9 Å     | 2.1Å (149),<br>2.2Å (192) &<br>2.3Å (193) | <2.0 Å    | <2.0 Å   |
| Glu      | <2.0 Å    | <2.0 Å     | 0.9 Å     | 2.1Å (149),<br>2.2Å (192) &<br>2.3Å (193) | <2.0 Å    | <2.0 Å   |
| Phe      | <2.0 Å    | <2.0 Å     | 0.9 Å     | 2.1Å (149),<br>2.2Å (192) &<br>2.3Å (193) | <2.0 Å    | <2.0 Å   |
| Gly      | <2.0 Å    | <2.0 Å     | 0.9 Å     | 2.1Å (149),<br>2.2Å (192) &<br>2.3Å (193) | <2.0 Å    | <2.0 Å   |
| His      | <2.0 Å    | <2.0 Å     | 0.9 Å     | 2.1Å (149),<br>2.2Å (192) &<br>2.3Å (193) | <2.0 Å    | <2.0 Å   |
| Ile      | <2.0 Å    | <2.0 Å     | 0.9 Å     | 2.1Å (149),<br>2.2Å (192) &<br>2.3Å (193) | <2.0 Å    | <2.0 Å   |
| Lys      | <2.0 Å    | <2.0 Å     | 0.9 Å     | 2.1Å (149),<br>2.2Å (192) &<br>2.3Å (193) | <2.0 Å    | <2.0 Å   |
| Leu      | <2.0 Å    | <2.0 Å     | 0.9 Å     | 2.1Å (149),<br>2.2Å (192) &<br>2.3Å (193) | <2.0 Å    | <2.0 Å   |
| Met      | 0.5 Å     | 2.1Å (150) | 0.9 Å     | 2.1Å (149),<br>2.2Å (192) &               | <2.0 Å    | <2.0 Å   |

# SUPPLEMENTARY DATA

|     |       |                            |       |                                              |        |                                                            |
|-----|-------|----------------------------|-------|----------------------------------------------|--------|------------------------------------------------------------|
|     |       |                            |       | 2.3 Å (193)                                  |        |                                                            |
| Asn | 0.5 Å | 2.1 Å (150)                | 0.9 Å | 2.1 Å (149),<br>2.2 Å (192) &<br>2.3 Å (193) | <2.0 Å | <2.0 Å                                                     |
| Pro | 0.5 Å | 2.1 Å (150)                | 0.9 Å | 2.1 Å (149),<br>2.2 Å (192) &<br>2.3 Å (193) | <2.0 Å | <2.0 Å                                                     |
| Gln | 0.5 Å | 2.1 Å (150)                | 0.9 Å | 2.1 Å (149),<br>2.2 Å (192) &<br>2.3 Å (193) | <2.0 Å | <2.0 Å                                                     |
| Arg | 0.5 Å | 2.1 Å (150)                | 0.9 Å | 2.1 Å (149),<br>2.2 Å (192) &<br>2.3 Å (193) | <2.0 Å | <2.0 Å                                                     |
| Ser | 0.2 Å | 2.6 Å (38) &<br>2.9 Å (53) | 0.9 Å | 2.1 Å (149),<br>2.2 Å (192) &<br>2.3 Å (193) | <2.0 Å | <2.0 Å                                                     |
| Thr | 0.2 Å | 2.6 Å (38) &<br>2.9 Å (53) | 0.9 Å | 2.1 Å (149),<br>2.2 Å (192) &<br>2.3 Å (193) | <2.0 Å | <2.0 Å                                                     |
| Val | 0.5 Å | 2.1 Å (150)                | 0.9 Å | 2.1 Å (149),<br>2.2 Å (192) &<br>2.3 Å (193) | <2.0 Å | <2.0 Å                                                     |
| Trp | 0.5 Å | 2.1 Å (150)                | 0.9 Å | 2.1 Å (149),<br>2.2 Å (192) &<br>2.3 Å (193) | 1.29 Å | 2.3 Å (5),<br>2.12 Å (56),<br>2.3 Å (192) &<br>2.2 Å (193) |
| Tyr | 0.5 Å | 2.1 Å (150)                | 0.9 Å | 2.1 Å (149),<br>2.2 Å (192) &<br>2.3 Å (193) | <2.0 Å | <2.0 Å                                                     |

NOTE: Values in parentheses indicate the position of the deviation.
